# Supplementary material for: Effects of using mobile augmented reality for simple interest computation in a financial mathematics course
Source: PeerJ Comput Sci. 2021 Jun 29;7:e618. doi: 10.7717/peerj-cs.618 (PMC8279137; doi:10.7717/peerj-cs.618)
Supplement: Supplemental Information 1 [file peerj-cs-07-618-s001.xlsx]

## Sheet: CompleteData
		Pretest												Postest
							Motivation (ARCS PROFESSOR)							Motivation (ARCS SICMAR)												TAM											Quality
Age	Gender	A1	A2	A3	R1	R2	R3	C1	C2	C3	S1	S2	S3	A21	A22	A23	R21	R22	R23	C21	C22	C23	S21	S22	S23	PU1	PU2	PU3	PU4	PEU1	PEU2	PEU3	PEU4	PEU5	ITU1	ITU2	Q1	Q2	Q3	Q4	Q5	Q6	Q7	Q8	Q9	Q10
19	5	3	3	3	3	3	4	3	4	3	3	3	3	5	5	5	4	5	5	5	5	5	5	5	5	5	5	5	5	5	5	5	5	5	5	5	5	5	5	5	5	5	5	5	5	5
20	1	4	4	3	3	3	4	3	3	3	2	3	3	3	4	4	3	5	4	5	5	4	4	3	4	5	5	5	5	5	5	4	5	5	5	5	5	5	4	4	3	4	3	3	4	4
19	5	4	4	4	3	4	4	3	4	4	4	4	4	3	3	3	4	4	5	3	3	3	2	3	3	3	2	3	3	4	4	3	3	3	3	2	3	3	4	4	3	4	2	2	3	4
18	5	4	4	3	4	3	4	5	4	4	3	3	3	5	5	5	5	5	5	5	4	5	5	5	5	5	5	5	5	5	5	5	5	5	5	5	5	5	5	5	3	5	5	5	5	4
19	5	4	4	5	3	5	5	5	3	4	4	3	4	4	3	3	5	4	4	4	3	4	4	3	4	4	4	5	5	2	3	2	3	3	5	5	4	4	3	4	1	3	3	4	2	2
20	5	5	5	5	4	5	4	4	4	5	4	4	5	5	4	3	5	4	5	5	5	5	4	4	4	4	4	4	4	2	4	3	2	4	4	5	5	4	5	3	1	4	3	3	4	4
20	1	4	5	5	4	4	5	4	5	4	4	5	5	5	4	5	5	4	4	4	4	5	5	4	5	5	4	5	5	5	4	5	5	5	4	5	5	5	4	5	5	5	5	5	5	5
20	1	4	4	3	3	4	3	3	3	3	3	4	4	4	3	3	4	4	4	3	3	3	4	4	4	4	4	4	4	4	4	4	4	4	4	4	3	3	3	3	2	4	4	4	3	4
18	5	4	5	5	3	3	4	5	5	5	3	4	3	4	3	3	4	3	4	3	4	3	4	4	3	3	3	4	3	2	3	2	3	4	5	5	5	3	5	3	3	4	3	3	2	3
19	1	3	4	4	3	4	5	3	2	3	3	4	3	1	3	3	1	3	1	1	1	3	1	1	3	1	3	3	1	1	1	3	1	2	1	1	1	1	1	3	3	1	3	3	3	3
19	5	5	4	5	5	5	4	5	4	5	4	4	4	4	4	5	5	5	5	5	4	4	4	5	4	4	4	5	4	4	5	5	4	5	5	5	5	5	5	5	5	5	4	4	4	4
20	1	3	4	4	3	4	4	4	3	4	3	4	4	4	4	4	4	5	4	4	4	4	3	4	4	4	4	4	4	4	4	4	4	4	4	4	4	4	4	4	4	4	4	4	4	4
19	5	4	4	5	3	5	5	4	3	4	5	3	4	3	4	3	3	4	4	4	3	3	2	2	2	2	2	2	2	4	4	4	3	3	1	3	4	4	4	2	1	4	2	2	1	1
19	5	4	4	4	4	4	4	5	4	5	5	5	5	3	2	2	4	3	3	3	4	2	2	3	3	2	2	2	3	2	3	3	3	3	3	4	4	4	2	4	3	4	3	4	3	2
18	5	4	4	3	3	4	4	3	3	4	3	4	3	5	5	5	4	4	4	4	4	4	4	4	4	4	4	4	4	4	4	4	4	4	4	4	4	4	4	4	3	4	3	4	4	4
18	5	4	5	4	3	5	5	5	4	5	3	5	5	5	5	5	5	2	5	5	5	5	5	5	5	5	5	5	5	5	5	5	5	5	5	5	5	5	5	5	3	5	5	5	4	4
20	1	3	3	4	2	3	3	3	4	4	3	4	3	5	5	5	5	5	4	3	4	5	4	4	3	3	3	4	5	5	5	5	5	5	4	5	5	4	5	5	4	5	4	5	5	5
19	5	4	4	4	4	5	5	5	5	4	3	3	4	5	5	5	5	5	4	3	3	4	3	3	3	3	4	4	4	3	5	5	5	5	5	5	5	2	5	5	4	5	1	5	5	5
20	5	4	5	5	4	4	3	5	5	4	3	4	5	5	5	5	5	4	5	5	5	5	4	4	5	5	5	4	2	2	5	5	5	5	3	5	5	3	5	5	1	5	5	2	4	2
18	1	4	5	4	4	5	4	4	3	4	3	4	4	4	5	5	5	5	5	4	4	4	5	5	5	4	4	4	5	5	5	5	4	5	4	4	5	5	5	4	3	5	4	4	4	4
21	1	5	3	4	3	4	5	5	4	5	3	4	4	5	5	5	5	5	5	5	5	5	5	5	5	5	5	5	5	5	5	5	5	5	5	5	5	5	5	5	5	5	5	5	5	5
21	5	4	4	5	1	5	5	4	5	4	4	5	5	5	5	5	5	5	5	5	5	5	4	4	5	5	5	5	5	4	3	3	2	3	5	5	5	4	3	2	1	5	4	3	2	3
20	1	4	2	2	4	4	2	2	2	2	3	4	3	5	5	4	5	5	4	3	5	5	3	5	5	4	5	5	5	3	4	3	4	5	3	4	5	5	5	5	3	5	5	3	3	5
21	5	4	4	5	3	4	4	5	4	4	4	4	4	3	3	4	4	3	4	3	4	4	3	4	3	3	2	3	4	2	2	4	2	4	3	4	4	4	3	4	2	4	2	1	3	3
19	5	5	5	5	5	5	5	5	5	5	5	5	5	5	5	5	5	4	5	4	5	4	5	5	5	4	4	5	5	5	5	5	4	5	4	4	5	5	5	5	4	4	4	4	3	3
20	5	4	4	3	3	4	5	4	4	4	4	4	3	4	4	3	4	4	4	4	4	4	5	5	5	4	5	4	5	4	5	5	5	5	4	5	3	3	4	4	5	5	3	4	4	5
20	1	4	4	3	3	3	4	4	3	4	3	3	3	5	4	5	4	5	5	5	5	4	5	5	5	4	5	5	5	3	5	5	5	5	5	5	5	5	5	5	5	5	5	4	5	4
20	1	3	3	3	4	4	5	3	3	3	2	2	3	3	3	3	5	4	5	5	5	4	3	5	3	4	4	4	4	3	5	5	3	4	5	4	4	5	4	4	4	5	4	5	4	4
18	1	4	5	4	2	4	3	5	4	4	3	4	4	4	4	3	5	4	3	4	5	5	3	3	4	4	5	5	5	3	5	5	5	5	4	5	5	3	4	4	2	5	4	4	3	3
18	1	4	4	3	3	4	5	4	3	4	3	4	4	5	5	5	5	5	4	5	5	5	5	5	5	5	5	5	5	4	5	5	4	4	5	5	5	4	5	5	4	5	4	5	4	4
19	1	4	5	5	5	5	5	5	5	5	4	5	4	5	3	4	5	5	5	5	5	5	4	4	4	4	5	4	5	5	5	3	3	4	4	5	5	5	5	4	1	5	5	5	3	3
18	5	4	4	5	4	4	5	4	3	4	3	3	4	3	3	3	4	4	4	4	3	3	3	3	3	4	4	4	4	4	5	3	4	4	4	5	4	4	3	2	2	4	4	4	3	4
19	5	4	5	5	3	4	5	5	4	5	5	5	5	4	3	3	5	5	3	4	3	4	4	4	3	4	3	2	5	2	5	1	1	4	4	5	5	4	3	3	1	3	4	3	2	2
19	1	3	2	3	4	2	3	3	4	3	4	4	4	5	5	5	4	3	5	5	5	4	5	5	5	5	5	5	5	4	5	5	5	5	5	5	4	4	4	4	3	4	5	5	5	5
19	5	5	5	5	5	5	5	5	5	5	5	5	5	5	5	5	5	5	5	5	5	5	3	5	5	5	5	5	5	5	5	5	5	5	5	5	5	5	5	5	5	5	5	3	3	3
20	1	5	5	5	5	5	4	4	5	5	5	5	5	4	4	5	5	5	5	2	2	3	3	3	4	3	2	3	3	2	5	2	5	5	3	5	5	5	5	5	2	5	4	4	2	1
21	1	3	4	4	3	5	5	4	3	4	5	4	4	5	5	5	3	4	5	4	3	4	5	5	5	4	3	5	4	5	5	5	5	5	5	5	3	4	5	5	5	5	4	5	4	5
21	1	4	4	5	1	4	5	3	3	4	5	5	4	5	5	5	5	5	3	4	3	4	4	4	5	3	3	5	4	2	5	5	5	5	5	5	5	3	5	5	3	5	5	3	5	3
21	1	3	2	3	1	2	2	3	1	2	3	2	3	1	2	2	1	1	1	2	1	2	1	1	1	1	1	1	1	2	3	4	2	3	1	3	2	3	4	4	2	3	2	2	1	2
19	5	4	4	5	3	5	5	5	4	4	4	4	4	5	5	4	4	5	5	5	5	5	5	5	5	5	5	5	5	5	5	3	5	5	5	5	5	5	3	5	4	4	3	5	5	4
19	5	4	4	5	3	5	5	5	3	4	4	4	4	4	3	4	5	4	5	4	5	4	5	5	5	4	4	4	4	3	3	3	4	4	5	5	5	5	5	5	5	5	3	2	3	3
19	5	3	3	2	2	2	3	3	2	2	3	3	3	5	4	4	4	4	4	5	5	4	4	4	4	4	3	5	4	4	4	4	4	3	4	5	5	4	4	4	3	4	3	3	3	3
18	5	4	5	5	5	3	5	5	4	5	5	5	5	5	4	5	5	5	5	5	5	4	4	4	5	3	2	5	5	5	5	5	5	4	4	5	5	4	4	5	4	5	4	5	5	5
20	1	5	4	4	4	4	4	4	3	5	4	4	3	2	2	2	4	4	3	3	3	4	3	3	3	4	3	2	2	1	1	2	2	2	4	4	4	4	2	2	2	5	4	3	3	1
27	5	4	4	4	4	4	4	4	4	4	3	3	3	4	4	3	4	4	5	4	5	4	4	4	5	5	5	3	4	3	5	5	3	4	5	5	5	4	3	4	3	5	4	5	4	4
19	5	2	3	2	2	3	2	3	1	3	3	3	3	4	4	3	4	4	5	4	5	4	4	4	5	5	5	3	4	3	4	5	3	4	5	5	5	4	3	4	3	5	4	4	4	4
30	5	5	5	5	5	5	5	5	2	5	5	5	5	4	4	4	5	5	5	3	4	4	4	5	5	3	4	5	5	5	5	5	5	5	5	5	2	5	5	5	2	5	5	5	5	5
21	5	4	4	3	4	4	4	4	3	4	4	3	3	5	5	5	5	5	5	5	5	5	5	5	5	5	5	5	5	5	5	4	5	5	5	5	5	5	5	5	4	5	5	5	5	5
20	1	3	4	3	4	5	5	4	3	3	4	4	3	4	3	4	4	5	4	4	5	4	4	5	5	4	5	5	3	4	5	5	4	5	5	5	5	5	3	4	3	5	4	5	4	4
19	5	2	2	2	3	2	2	2	4	3	2	2	3	5	5	5	5	5	5	3	4	5	5	5	5	4	5	5	5	5	5	3	4	4	5	5	5	4	5	4	3	5	3	3	3	4
20	5	4	3	3	3	5	5	4	4	4	3	4	3	5	5	4	5	3	4	4	4	4	4	4	5	3	4	3	4	3	3	3	4	4	4	3	4	4	4	3	2	5	2	2	3	3
21	1	2	3	4	2	5	5	3	3	4	4	4	4	5	4	5	5	5	4	4	4	4	5	4	5	4	4	3	3	4	5	5	4	4	5	5	4	4	5	4	5	4	2	4	4	5
20	1	2	2	2	3	3	4	3	2	3	3	3	3	4	5	4	3	4	3	2	4	3	3	3	5	4	3	4	3	3	4	4	4	5	5	4	2	4	4	5	4	4	4	5	3	3
19	5	3	4	3	4	3	4	4	3	4	2	3	3	5	4	5	5	5	5	5	4	4	4	5	5	5	5	5	5	5	5	4	5	5	5	5	5	5	5	5	4	5	5	4	5	5
19	5	4	4	5	4	3	5	5	3	4	2	3	4	5	5	5	5	5	5	4	5	5	4	5	5	4	5	5	5	4	5	5	5	5	5	5	5	5	4	5	5	5	4	4	4	5
22	1	4	4	4	5	4	4	3	3	3	4	4	4	5	5	5	5	5	5	4	4	4	4	4	5	3	4	4	4	4	5	5	5	4	5	5	4	3	5	4	5	5	4	3	4	4
18	5	3	4	5	2	4	4	5	3	3	4	4	4	4	5	5	5	4	5	5	4	5	4	4	5	4	3	4	4	5	4	3	4	3	5	5	5	4	5	5	3	4	4	3	5	3
18	5	4	4	5	5	5	4	5	5	5	4	4	4	3	3	3	4	4	4	4	4	4	3	3	3	3	3	2	2	2	1	2	2	2	2	2	5	3	3	3	1	4	2	3	3	3
19	5	4	4	5	3	5	5	5	2	4	5	4	5	1	4	5	5	5	4	4	5	3	5	4	5	4	5	4	4	5	5	4	4	5	5	5	5	4	3	4	2	4	4	3	2	2
18	5	4	3	3	2	5	5	5	3	4	3	3	5	3	3	4	5	5	5	3	3	3	3	3	3	3	2	4	3	2	4	2	4	5	3	5	5	5	4	3	2	5	5	3	2	2
24	5	5	4	4	3	4	4	4	3	4	3	4	4	5	5	5	5	5	5	5	5	5	5	5	5	5	5	5	5	5	5	5	5	5	5	5	5	5	5	5	3	3	4	3	5	3
19	5	4	4	4	3	4	4	3	4	4	3	3	4	4	4	4	4	4	4	4	4	4	3	4	4	4	4	4	3	3	4	3	3	3	4	3	3	4	4	2	2	4	4	3	2	2
20	1	3	3	4	3	4	4	4	3	3	3	3	4	5	4	5	5	5	4	5	4	5	4	5	5	4	5	5	5	5	5	5	5	5	5	5	4	5	5	5	4	5	2	4	5	5
29	1	4	3	4	4	4	4	4	4	4	4	4	4	5	2	4	5	5	5	5	3	4	5	4	4	4	3	4	5	3	3	3	3	3	5	5	5	5	2	3	2	5	4	2	3	3
19	5	5	4	4	2	5	5	4	4	5	5	5	5	4	3	3	5	5	5	3	5	4	5	4	5	4	4	4	4	5	5	4	4	4	4	4	5	3	3	2	1	2	3	4	4	3
20	1	3	3	2	3	3	4	3	3	3	3	4	3	2	2	2	2	1	2	3	2	3	3	2	3	3	3	2	3	3	2	3	2	3	2	3	3	3	4	5	5	1	2	3	3	2
20	5	3	3	2	2	2	3	2	2	3	2	2	3	3	3	3	3	3	3	3	3	3	3	3	3	3	3	3	3	3	3	3	3	3	3	3	3	3	3	3	3	3	3	3	3	3
18	5	4	4	4	4	3	5	4	2	3	3	3	4	4	4	4	4	5	5	4	5	5	4	4	5	3	4	5	5	3	4	2	3	3	5	5	4	5	5	5	3	3	3	3	3	2
20	5	5	4	5	3	4	4	4	4	4	4	4	4	4	4	4	4	4	4	4	4	4	4	4	5	5	5	5	5	5	5	5	5	5	5	4	4	4	4	4	4	4	4	4	4	4
20	1	3	3	4	2	3	3	4	2	3	3	3	3	3	4	4	4	4	3	4	3	3	3	2	4	4	4	5	5	5	4	4	4	3	3	3	4	4	5	5	5	5	4	4	4	3
19	5	1	1	1	1	1	1	1	1	1	1	1	1	5	5	5	5	5	5	5	5	5	5	5	5	5	5	5	5	4	5	5	3	5	5	5	5	5	5	5	5	5	5	4	5	3
18	5	4	4	4	3	4	4	4	3	5	3	4	4	4	5	5	5	4	4	4	5	4	3	4	4	5	4	5	5	5	5	4	4	4	4	5	4	4	4	4	3	4	4	4	3	4
19	5	4	5	5	5	5	4	5	4	4	3	4	5	4	5	5	5	5	5	5	5	5	4	3	5	5	5	5	5	5	5	5	5	5	5	4	5	5	5	5	4	5	5	5	5	4
20	1	3	2	1	1	3	5	4	3	4	2	4	3	5	5	5	3	4	5	5	5	5	3	4	4	5	5	5	5	5	5	5	5	4	5	4	5	5	3	5	3	5	2	5	5	5
20	5	4	5	5	4	5	5	5	4	5	5	5	4	5	4	5	5	5	5	4	4	4	5	5	5	4	4	5	4	4	5	5	4	4	5	5	5	4	4	4	4	5	4	5	4	4
20	1	4	4	4	4	5	5	5	5	5	3	3	3	5	4	4	4	4	5	5	3	4	5	5	4	3	4	4	3	5	4	4	4	3	4	5	4	4	4	4	4	4	3	5	4	4
19	5	3	3	3	2	2	4	3	3	3	3	2	3	4	3	4	4	4	5	4	4	4	4	4	5	4	4	5	4	3	5	4	4	5	4	4	3	4	3	4	2	5	4	4	4	3
18	5	4	4	5	4	5	5	4	4	5	4	5	5	4	4	5	5	4	4	5	5	5	4	5	5	5	4	5	5	5	5	4	4	4	5	5	5	5	4	4	4	5	4	4	3	4
19	5	4	4	4	2	4	3	5	4	3	4	4	4	4	5	5	5	4	5	5	3	4	5	4	5	4	4	5	5	5	5	5	5	5	5	5	5	5	3	4	4	4	4	5	5	5
22	1	4	4	4	5	4	4	5	3	4	3	4	4	4	5	5	4	3	5	4	4	4	5	5	5	4	5	5	5	4	3	5	5	5	5	5	5	5	5	5	4	4	5	4	5	4
21	1	5	4	4	4	4	3	4	3	4	5	5	4	5	5	5	5	5	5	5	5	5	5	5	5	5	5	5	5	3	5	4	3	5	5	5	5	5	5	5	3	5	5	5	3	3
22	5	5	5	4	3	5	5	5	4	5	4	5	5	5	5	5	5	5	4	4	4	4	4	4	4	4	4	4	5	5	5	3	5	5	5	5	5	5	5	5	5	5	5	4	3	5
19	5	4	5	5	4	5	5	5	4	5	4	4	4	5	5	5	5	5	5	5	3	4	4	4	5	5	5	5	5	4	4	3	3	4	5	5	5	4	4	4	3	5	4	3	3	3
19	1	5	5	5	4	5	5	5	4	5	5	5	5	5	5	4	5	5	5	5	4	5	5	5	5	5	5	5	5	3	4	5	5	5	5	5	5	5	5	5	2	5	5	5	5	5
18	1	4	4	3	3	4	3	5	3	4	3	3	5	5	5	5	5	5	5	4	4	5	5	5	5	4	4	5	4	4	5	3	5	3	5	4	4	5	4	3	2	5	4	4	4	3
20	1	4	4	4	4	4	4	4	4	4	4	4	4	4	2	2	4	3	4	3	3	3	3	3	3	3	3	3	3	3	3	4	3	3	3	3	3	2	4	4	2	4	2	2	1	1
20	1	5	5	5	4	4	5	5	4	4	4	4	5	4	5	5	5	5	4	4	4	4	3	4	5	4	3	5	4	3	4	5	4	3	3	3	4	4	4	3	2	4	3	3	4	4
18	1	5	5	5	4	4	4	4	4	4	4	4	4	4	3	4	4	4	4	4	4	4	4	4	4	3	4	4	4	3	4	4	3	4	4	4	4	4	4	4	3	4	4	4	4	4
18	5	4	5	5	3	4	5	5	5	4	4	5	5	4	4	3	5	5	4	5	4	4	4	4	3	3	4	4	4	3	3	3	3	4	4	4	5	4	5	4	3	5	5	3	2	2
19	5	5	5	5	3	5	5	5	4	5	4	5	5	5	4	2	5	5	5	5	5	5	4	5	5	4	4	5	4	3	5	5	2	4	4	5	5	5	5	3	1	4	3	2	4	3
22	1	4	3	2	2	3	4	4	3	4	3	3	3	4	4	5	4	4	5	4	5	4	4	4	5	4	3	5	5	4	5	5	4	4	5	5	5	4	5	5	4	5	4	4	3	3
20	1	4	3	3	4	3	3	3	3	3	3	3	3	4	4	3	4	4	3	3	2	3	3	4	3	4	3	4	3	4	4	4	4	3	3	4	4	4	3	3	4	2	3	3	3	4
19	1	4	4	4	3	4	3	4	5	4	3	4	4	5	5	4	5	5	4	3	3	4	3	4	4	4	4	4	5	5	5	5	5	5	5	5	5	5	4	5	4	4	3	5	4	5
19	1	3	4	4	5	5	5	3	4	3	4	3	4	3	3	3	5	2	5	3	5	3	3	3	3	5	4	4	3	2	5	4	5	5	3	5	5	5	3	2	2	3	3	2	2	3
19	5	5	5	5	4	5	5	5	5	5	5	5	5	4	4	4	5	4	5	4	4	4	4	4	4	4	4	4	4	3	4	3	4	4	4	4	5	5	5	5	3	4	5	3	3	3
18	5	5	5	5	5	5	5	5	4	4	4	5	5	4	5	5	5	4	5	4	4	4	4	3	3	3	4	4	4	4	5	5	4	5	5	4	5	5	5	5	3	4	5	4	5	4
19	5	5	5	5	4	5	5	5	4	4	4	4	4	4	4	4	5	4	4	4	4	3	4	5	5	4	4	4	4	3	3	4	2	4	4	4	5	4	5	2	2	5	5	3	3	3
20	5	4	5	5	3	4	5	5	5	4	4	5	5	5	4	5	5	5	5	5	4	5	4	5	5	4	4	4	5	5	4	4	4	3	4	5	4	4	4	5	3	5	4	3	3	3
19	1	5	5	5	4	5	5	5	4	5	5	5	5	4	4	5	5	5	5	4	4	4	4	4	5	5	5	5	4	4	4	4	4	4	5	5	5	5	5	5	4	4	4	3	4	3
22	1	4	4	3	4	4	4	3	3	3	3	3	3	3	4	4	4	4	3	2	4	4	3	3	4	4	2	3	3	2	4	2	3	3	4	4	4	4	4	4	4	5	3	3	3	4
19	5	5	5	5	3	4	5	5	4	5	5	5	5	4	4	4	5	5	5	4	4	5	5	5	5	5	5	5	5	5	5	5	5	5	5	5	5	5	5	5	5	5	5	5	5	5
19	5	4	5	5	2	5	5	5	4	5	5	4	5	5	5	5	5	5	3	5	5	5	5	5	5	4	5	5	5	5	5	5	4	5	5	4	5	4	5	3	1	5	3	5	5	4
20	1	3	3	3	4	4	3	4	4	3	3	3	4	4	3	4	5	4	5	4	4	3	2	3	3	3	3	5	3	5	5	2	3	5	4	5	5	5	3	3	3	5	3	4	4	3
